# Supplementary figures and images for: Systematic Review of Integrated General Medical and Psychiatric Self-Management Interventions for Adults With Serious Mental Illness
Source: Atypon-hosted journal article supplement (doi:10.1176/appi.ps.201500521), 2016-06-15

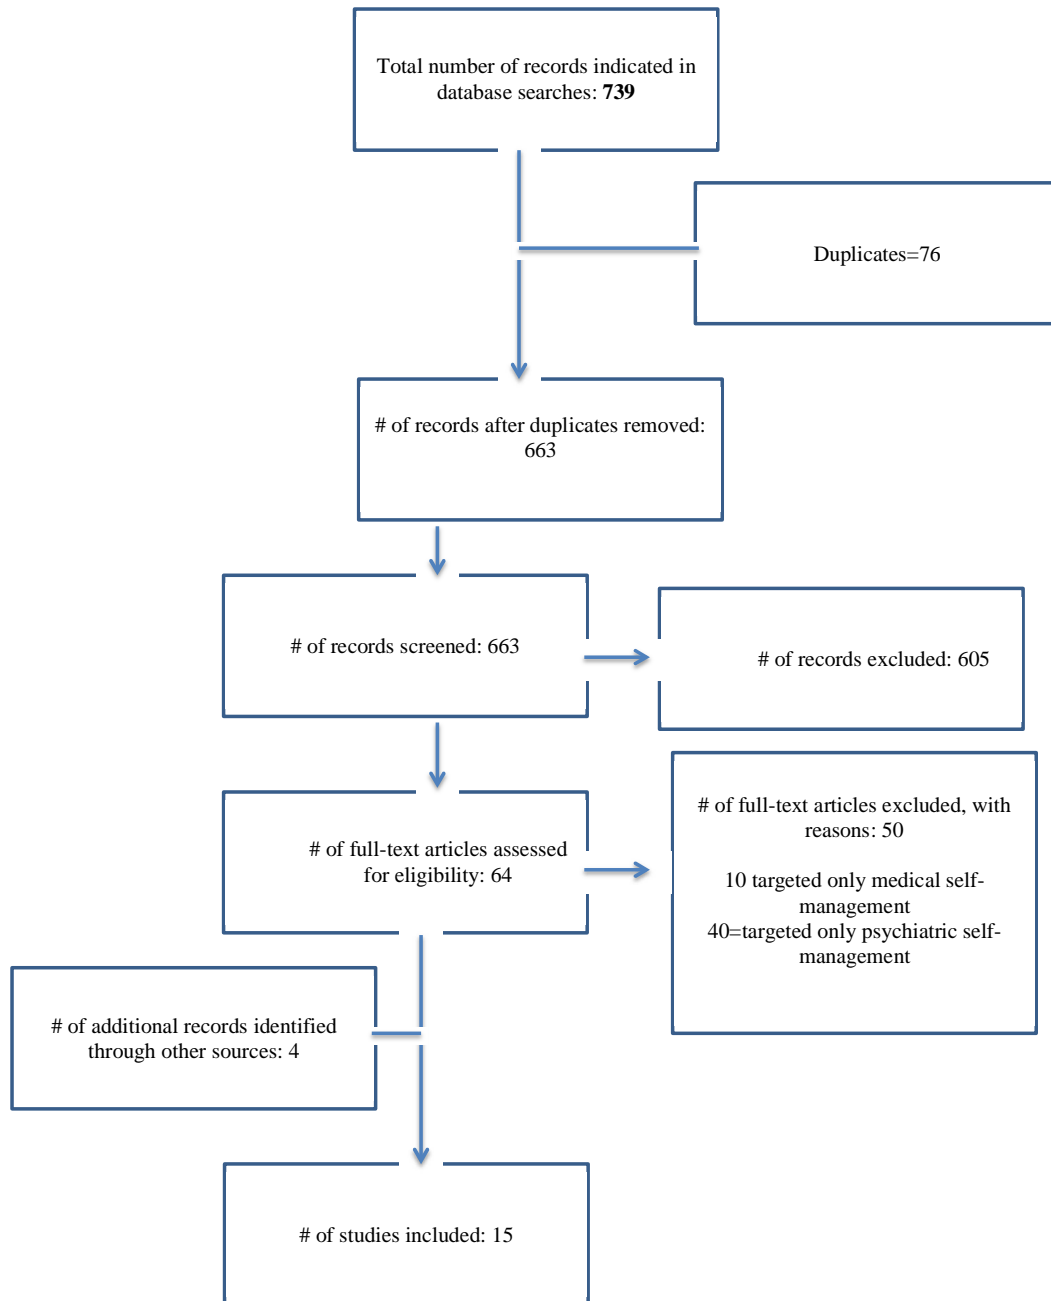

Figure 1. Study selection flow diagram

Supplement: appi.ps.201500521.ds001.pdf [file appi.ps.201500521.ds001.pdf]
